# Supplementary material for: A strategy towards the synthesis of superhydrophobic/superoleophilic non-fluorinated polypyrrole nanotubes for oil–water separation
Source: Royal Society of Chemistry journal article supplement (doi:10.1039/d0ra06409b), 2020-01-01
Supplement: d0ra06409b1.pdf [file d0ra06409b1.pdf]

## Electronic supplementary information

### A Strategy towards Synthesis of Superhydrophobic/ Superoleophilic Non-Fluorinated Polypyrrole Nanotubes for Oil-Water Separation

Purushottam Jha<sup>a,b</sup>, Shankar P. Koiry<sup>\*a,b</sup>, C. Sridevi<sup>a</sup>, Verender Putta<sup>a</sup>, Deeksha Gupta<sup>b</sup>, and Anil K. Chauhan<sup>\*a,b</sup>

To investigate the effect of oil absorption on morphology, the surface morphographs were recorded after retrieving the hexane from polypyrrole (PPy) powder. Fig S1 shows the surface morphology of the PPy before and after oil/water separation.

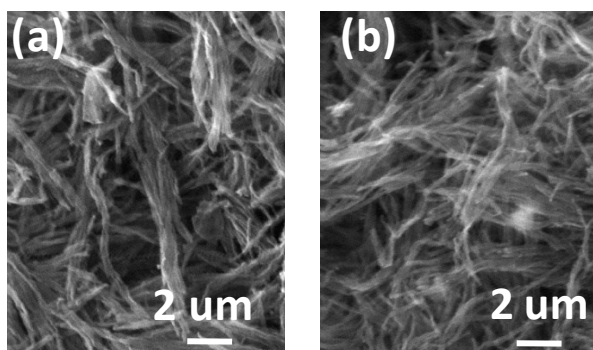

Fig. S1 SEM images of the PPy powder (a) before (b) after oil/water separation.
